# Supplementary material
Source: PubMed Central journal article supplement (PMC1693794)
Supplement: pnas_0603224103_1.pdf [file pnas_0603224103_1.pdf]

```

AMAC1L2 .....A.....C.....A.....
AMAC1L3 .....A.....T.....

          570      580      590      600      610      620      630      640
.....|.....|.....|.....|.....|.....|.....|.....|.....|.....|
AMAC1  CTACACCGCCCTGGGCTATGTGGAGGCTTTCTGGGAGGCCTGGCGCTGTCCCTGAGGCTTCTGGTCTATCGTTCTCTGC
AMAC1L1 .....G.....C.....A.....G.....C.....
AMAC1L2 .....A.....C.....G.....
AMAC1L3 .....G.C.....G.....A.....G.....

          650      660      670      680      690      700      710      720
.....|.....|.....|.....|.....|.....|.....|.....|.....|.....|
AMAC1  ACTTTCCCCCCTGCCTCCCAACAGTGGCCTTCTATCTGGCTTGGTGGGGCTGCTGGGCTCTGTGCCAGGCCTCTTTGTG
AMAC1L1 .....T.....
AMAC1L2 .....T.....G.....
AMAC1L3 .....T.....

          730      740      750      760      770      780      790      800
.....|.....|.....|.....|.....|.....|.....|.....|.....|.....|
AMAC1  CTGCAGGCCCCCGTGTGGCCAGTGACCTCCTGAGTTGGAGTTGTGTGGGGCAGTGGGGATCCTCGCCTTGGTCTCCTT
AMAC1L1 .....T.....A.....
AMAC1L2 .....A.....A.....
AMAC1L3 .....C.....T...C.....

          810      820      830      840      850      860      870      880
.....|.....|.....|.....|.....|.....|.....|.....|.....|.....|
AMAC1  CACATGTGTGGGCTATGCGGTCACCAAGGCCACCCTGCCCTGGTGTGCGCTGTCTACATTCCGAGGTGGTTGTGGCCC
AMAC1L1 .....T.....G.....GA.....
AMAC1L2 .....G.....
AMAC1L3 .....A.....G.....G.....

          890      900      910      920      930      940      950      960
.....|.....|.....|.....|.....|.....|.....|.....|.....|.....|
AMAC1  TTATACTGCAGTATTATATGCTCCATGAGACTGTGGCACCTTCTGACATCGTGGCGGCAGGGGTTGTGCTGGGCAGCATT
AMAC1L1 .....T.....A..G.....
AMAC1L2 .....T.....A..G.....
AMAC1L3 .....G.....

          970      980      990      1000      1010
.....|.....|.....|.....|.....|.....|.....|.....|.....|..
AMAC1  GCCATCATTACAGCCCAGAACCTCAGCTGTGAGAGGACAGGGAGGGTGGAGGAGTGA
AMAC1L1 .....G.....T.....A.....
AMAC1L2 .....G.....A.....
AMAC1L3 .....C.....TG.....GA.....A.....

```
