# Supplementary material
Source: PubMed Central journal article supplement (PMC1693794)

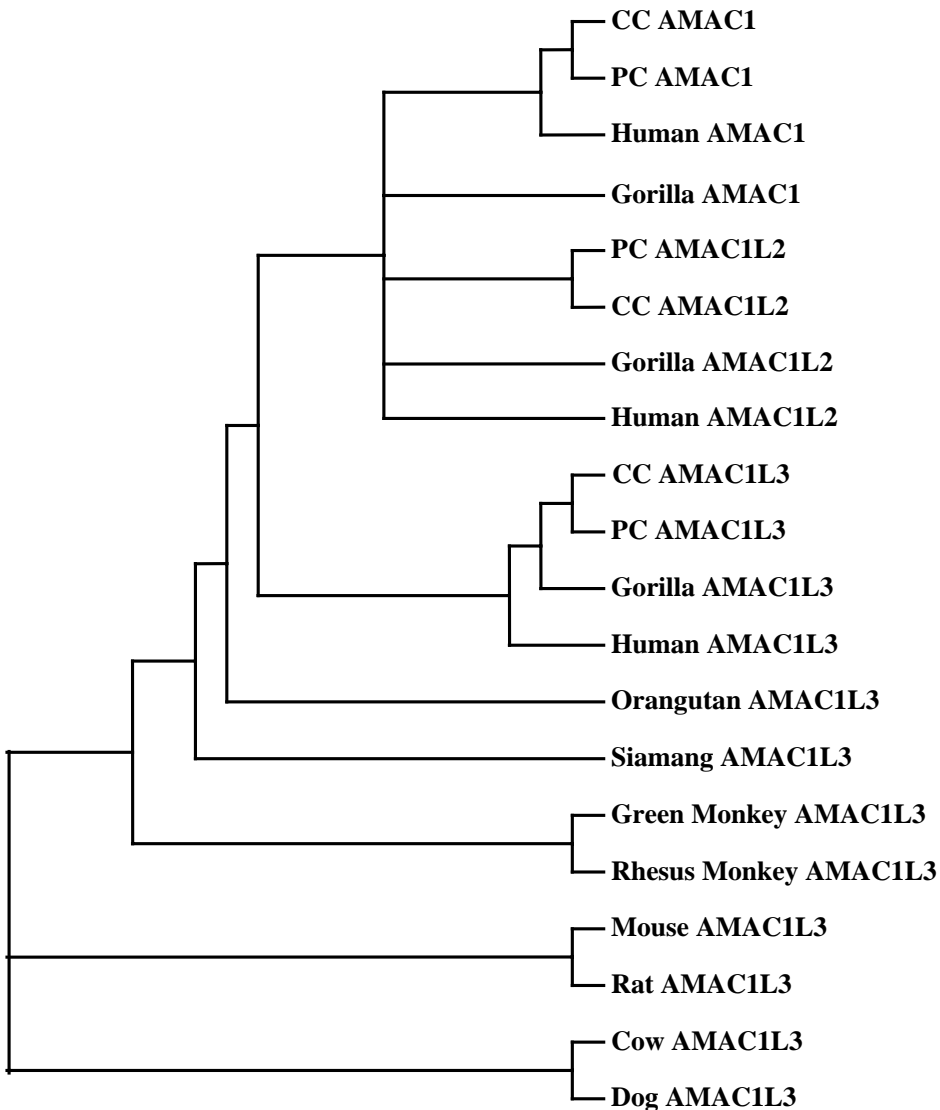

Supplement: pnas_0603224103_2.pdf [file pnas_0603224103_2.pdf]
